# Supplementary material
Source: PubMed Central journal article supplement (PMC3754633)
Supplement: JCM.00903-13_zjm999092768so1.pdf [file JCM.00903-13_zjm999092768so1.pdf]

**TABLE S1** Results of caspofungin susceptibility testing by the CLSI and ms-AFST methods for 65 clinical *C. albicans* isolates studied

| Isolate designation <sup>a</sup> | Fks1 phenotype <sup>b</sup> |            | CLSI                     |                                  | ms-AFST            |                       |          | Concordant with <i>FKS1</i> genotype <sup>e</sup> |
|----------------------------------|-----------------------------|------------|--------------------------|----------------------------------|--------------------|-----------------------|----------|---------------------------------------------------|
|                                  | Hot-spot 1                  | Hot-spot 2 | MIC (µg/ml) <sup>c</sup> | S, I, or R category <sup>d</sup> | Null CCI (mean±SD) | Maximum CCI (mean±SD) | <i>P</i> |                                                   |
| UCSC11-070512                    | WT                          | WT         | 0.03                     | S                                | 0.54±0.07          | 0.84±0.04             | 0.004    | Y                                                 |
| UCSC10-070512                    | WT                          | WT         | 0.03                     | S                                | 0.82±0.03          | 0.90±0.04             | 0.01     | Y                                                 |
| UCSC15-070512                    | WT                          | WT         | 0.03                     | S                                | 0.76±0.04          | 0.91±0.01             | 0.004    | Y                                                 |
| UCSC9-070512                     | WT                          | WT         | 0.03                     | S                                | 0.77±0.07          | 0.92±0.02             | 0.04     | Y                                                 |
| UCSC6-070512                     | WT                          | WT         | 0.03                     | S                                | 0.56±0.16          | 0.89±0.05             | 0.04     | Y                                                 |
| UCSC3-070512                     | WT                          | WT         | 0.03                     | S                                | 0.81±0.06          | 0.93±0.01             | 0.03     | Y                                                 |
| UCSC1-070512                     | WT                          | WT         | 0.03                     | S                                | 0.84±0.03          | 0.95±0.03             | 0.01     | Y                                                 |
| UCSC2-070512                     | WT                          | WT         | 0.03                     | S                                | 0.77±0.04          | 0.89±0.05             | 0.04     | Y                                                 |
| UCSC64-080512                    | WT                          | WT         | 0.03                     | S                                | 0.67±0.07          | 0.92±0.01             | 0.02     | Y                                                 |
| UCSC63-080512                    | WT                          | WT         | 0.03                     | S                                | 0.53±0.01          | 0.65±0.005            | 0.0003   | Y                                                 |
| UCSC59-080512                    | WT                          | WT         | 0.03                     | S                                | 0.58±0.03          | 0.78±0.05             | 0.04     | Y                                                 |
| UCSC52-080512                    | WT                          | WT         | 0.03                     | S                                | 0.76±0.08          | 0.92±0.04             | 0.02     | Y                                                 |
| UCSC51-080512                    | WT                          | WT         | 0.03                     | S                                | 0.69±0.11          | 0.87±0.06             | 0.03     | Y                                                 |
| UCSC50-080512                    | WT                          | WT         | 0.03                     | S                                | 0.70±0.06          | 0.87±0.05             | 0.007    | Y                                                 |
| UCSC110-090512                   | WT                          | WT         | 0.03                     | S                                | 0.76±0.05          | 0.85±0.01             | 0.02     | Y                                                 |
| UCSC109-090512                   | WT                          | WT         | 0.03                     | S                                | 0.77±0.05          | 0.90±0.05             | 0.01     | Y                                                 |
| UCSC104-090512                   | WT                          | WT         | 0.015                    | S                                | 0.61±0.04          | 0.79±0.08             | 0.02     | Y                                                 |
| UCSC102-090512                   | WT                          | WT         | 0.03                     | S                                | 0.74±0.005         | 0.82±0.02             | 0.0006   | Y                                                 |
| UCSC101-090512                   | WT                          | WT         | 0.03                     | S                                | 0.72±0.05          | 0.89±0.02             | 0.001    | Y                                                 |
| UCSC99-090512                    | WT                          | WT         | 0.03                     | S                                | 0.84±0.02          | 0.88±0.03             | 0.03     | Y                                                 |
| UCSC98-090512                    | WT                          | WT         | 0.03                     | S                                | 0.77±0.02          | 0.83±0.03             | 0.01     | Y                                                 |
| UCSC103-090512                   | WT                          | WT         | 0.03                     | S                                | 0.60±0.09          | 0.78±0.04             | 0.03     | Y                                                 |
| UCSC17-140512                    | WT                          | WT         | 0.03                     | S                                | 0.75±0.03          | 0.88±0.04             | 0.01     | Y                                                 |
| UCSC18-140512                    | WT                          | WT         | 0.03                     | S                                | 0.66±0.05          | 0.89±0.03             | 0.03     | Y                                                 |
| UCSC22-140512                    | WT                          | WT         | 0.03                     | S                                | 0.79±0.06          | 0.94±0.05             | 0.01     | Y                                                 |
| UCSC25-140512                    | WT                          | WT         | 0.03                     | S                                | 0.85±0.02          | 0.92±0.01             | 0.003    | Y                                                 |
| UCSC30-140512                    | WT                          | WT         | 0.03                     | S                                | 0.81±0.04          | 0.96±0.005            | 0.02     | Y                                                 |
| UCSC31-140512                    | WT                          | WT         | 0.03                     | S                                | 0.79±0.06          | 0.93±0.01             | 0.006    | Y                                                 |
| UCSC5-140512                     | WT                          | WT         | 0.03                     | S                                | 0.78±0.04          | 0.86±0.03             | 0.03     | Y                                                 |
| UCSC6-140512                     | WT                          | WT         | 0.03                     | S                                | 0.69±0.05          | 0.90±0.01             | 0.0003   | Y                                                 |
| UCSC54-030412                    | WT                          | WT         | 0.03                     | S                                | 0.37±0.22          | 0.72±0.17             | 0.02     | Y                                                 |
| UCSC9-100412                     | WT                          | WT         | 0.03                     | S                                | 0.78±0.08          | 0.88±0.01             | 0.04     | Y                                                 |
| UCSC12-100412                    | WT                          | WT         | 0.03                     | S                                | 0.68±0.08          | 0.83±0.08             | 0.04     | Y                                                 |
| UCSC52-030412                    | WT                          | WT         | 0.03                     | S                                | 0.71±0.01          | 0.91±0.02             | 0.001    | Y                                                 |
| UCSC89-040412                    | WT                          | WT         | 0.03                     | S                                | 0.74±0.04          | 0.93±0.05             | 0.04     | Y                                                 |
| UCSC4-100412                     | WT                          | WT         | 0.03                     | S                                | 0.84±0.04          | 0.94±0.03             | 0.007    | Y                                                 |
| UCSC20-160412                    | WT                          | WT         | 0.03                     | S                                | 0.75±0.07          | 0.89±0.01             | 0.008    | Y                                                 |
| UCSC15-150412                    | WT                          | WT         | 0.03                     | S                                | 0.72±0.09          | 0.89±0.01             | 0.01     | Y                                                 |
| UCSC104-180412                   | WT                          | WT         | 0.03                     | S                                | 0.59±0.04          | 0.90±0.01             | <0.0001  | Y                                                 |
| UCSC64-170412                    | WT                          | WT         | 0.015                    | S                                | 0.77±0.06          | 0.91±0.01             | 0.04     | Y                                                 |
| UCSC103-180412                   | WT                          | WT         | 0.03                     | S                                | 0.78±0.05          | 0.92±0.01             | 0.001    | Y                                                 |
| UCSC89-170412                    | WT                          | WT         | 0.03                     | S                                | 0.73±0.10          | 0.92±0.02             | 0.01     | Y                                                 |
| UCSC94-040412                    | WT                          | WT         | 0.03                     | S                                | 0.77±0.04          | 0.90±0.02             | 0.02     | Y                                                 |
| UCSC79-170412                    | WT                          | WT         | 0.03                     | S                                | 0.74±0.02          | 0.83±0.02             | 0.003    | Y                                                 |
| UCSC67-150512                    | WT                          | WT         | 0.03                     | S                                | 0.69±0.06          | 0.88±0.03             | 0.002    | Y                                                 |
| UCSC57-150512                    | WT                          | WT         | 0.03                     | S                                | 0.77±0.005         | 0.87±0.03             | 0.002    | Y                                                 |
| UCSC68-150512                    | WT                          | WT         | 0.03                     | S                                | 0.82±0.05          | 0.91±0.02             | 0.02     | Y                                                 |
| UCSC55-150512                    | WT                          | WT         | 0.03                     | S                                | 0.79±0.01          | 0.89±0.02             | 0.0006   | Y                                                 |
| UCSC63-150512                    | WT                          | WT         | 0.03                     | S                                | 0.74±0.06          | 0.94±0.05             | 0.005    | Y                                                 |

|                |       |          |      |   |            |           |         |    |
|----------------|-------|----------|------|---|------------|-----------|---------|----|
| UCSC54-150512  | WT    | WT       | 0.03 | S | 0.67±0.02  | 0.94±0.02 | <0.0001 | Y  |
| UCSC64-150512  | WT    | WT       | 0.03 | S | 0.83±0.10  | 0.91±0.01 | 0.16    | ND |
| UCSC52-150512  | WT    | WT       | 0.03 | S | 0.79±0.05  | 0.94±0.02 | 0.03    | Y  |
| DSP1012        | D648Y | WT       | 4    | R | 0.82±0.01  | 0.86±0.01 | 0.04    | N  |
| DSP1006        | F641L | WT       | 2    | R | 0.97±0.01  | 0.74±0.05 | 0.0002  | Y  |
| DSP1007        | F641S | WT       | 4    | R | 0.95±0.02  | 0.79±0.01 | <0.0001 | Y  |
| DSP1010        | S645F | WT       | 2    | R | 0.90±0.08  | 0.62±0.13 | 0.01    | Y  |
| DSP1011        | S645F | R1361R/H | 4    | R | 0.97±0.01  | 0.82±0.05 | 0.002   | Y  |
| DSP21          | S645P | WT       | 32   | R | 0.97±0.005 | 0.73±0.10 | 0.002   | Y  |
| DSP1009        | S645F | WT       | 4    | R | 0.98±0.01  | 0.86±0.03 | 0.003   | Y  |
| DSP1013        | P649H | WT       | 2.52 | R | 0.95±0.03  | 0.82±0.05 | 0.02    | Y  |
| DSP1040        | WT    | R1361H   | 2    | R | 0.82±0.05  | 0.81±0.16 | 0.91    | ND |
| DSP1014        | WT    | R1361R/H | 1    | R | 0.87±0.05  | 0.82±0.08 | 0.21    | ND |
| UCSC41-250612  | S645P | WT       | 4    | R | 0.93±0.04  | 0.60±0.08 | 0.0004  | Y  |
| UCSC78-270612  | S645P | WT       | 4    | R | 0.93±0.01  | 0.47±0.10 | 0.0001  | Y  |
| UCSC100-110612 | S645P | WT       | 4    | R | 0.81±0.02  | 0.57±0.04 | 0.0001  | Y  |

<sup>a</sup>Isolates are designated by source as follows: UCSC, culture strain collection of the Università Cattolica del Sacro Cuore (Rome, Italy); and DSP, culture strain collection of the UMDNJ-New Jersey Medical School (Newark, NJ, USA).

<sup>b</sup>WT, wild-type at mutational hot-spot Fks1 regions. Otherwise, the specific amino acid substitutions harbored by mutant isolates are indicated.

<sup>c</sup>Shown are geometric means values (three repetitions from separate preparations) for minimal inhibitory concentrations (MICs) as determined by the CLSI reference method.

<sup>d</sup>Isolate categorization was assessed according to the CLSI breakpoints for caspofungin and *C. albicans* that are ≤0.25 µg/ml (S), 0.5 µg/ml (I) and ≥1 µg/ml (R), respectively.

<sup>e</sup>Results by ms-AFST are expressed in terms of concordance with the absence or presence of *FKSI* hot-spot mutation(s), which was used as gold standard for susceptibility classification, and are designated as concordant (Y), not concordant (N), or not determined (ND) on the basis of statistically significant (Y or N) or not significant differences (ND) between the mean CCI values derived from the ‘null’ or ‘maximum’ spectral correlations (see text for details).
