# Supplementary material
Source: PubMed Central journal article supplement (PMC3754633)
Supplement: JCM.00903-13_zjm999092768so2.pdf [file JCM.00903-13_zjm999092768so2.pdf]

**TABLE S2** Composite correlation index (CCI) values for MALDI-TOF mass spectra obtained from selected 11 wild-type and *fks1* mutant *C. albicans* isolates

| Isolate designation <sup>a</sup> | UCSC6-100412          |                          | UCSC9-160412          |                          | UCSC29-160412         |                          | UCSC8-160412          |                          | UCSC99-180412         |                          | UCSC57-110412         |                          |
|----------------------------------|-----------------------|--------------------------|-----------------------|--------------------------|-----------------------|--------------------------|-----------------------|--------------------------|-----------------------|--------------------------|-----------------------|--------------------------|
| CSF concentration (µg/ml)        | Null CCI <sup>b</sup> | Maximum CCI <sup>b</sup> |
| 0                                | 0.97                  | 0.64                     | 0.97                  | 0.89                     | 1                     | 0.65                     | 1                     | 0.93                     | 0.98                  | 0.58                     | 1                     | 0.86                     |
| 0.004                            | 0.54                  | 0.85                     | 0.83                  | 0.90                     | 0.66                  | 0.82                     | 0.85                  | 0.91                     | 0.16                  | 0.51                     | 0.76                  | 0.87                     |
| 0.008                            | 0.56                  | 0.87                     | 0.86                  | 0.92                     | 0.63                  | 0.83                     | 0.70                  | 0.83                     | 0.36                  | 0.54                     | 0.89                  | 0.96                     |
| 0.016                            | 0.48                  | 0.85                     | 0.84                  | 0.91                     | 0.73                  | 0.89                     | 0.68                  | 0.77                     | 0.15                  | 0.49                     | 0.89                  | 0.96                     |
| 0.03                             | 0.48                  | 0.85                     | 0.88                  | 0.94                     | 0.67                  | 0.88                     | 0.74                  | 0.85                     | 0.03                  | 0.52                     | 0.84                  | 0.93                     |
| 0.06                             | 0.54                  | 0.87                     | 0.86                  | 0.95                     | 0.73                  | 0.90                     | 0.82                  | 0.89                     | 0.16                  | 0.54                     | 0.82                  | 0.95                     |
| 0.125                            | 0.49                  | 0.79                     | 0.83                  | 0.92                     | 0.68                  | 0.94                     | 0.74                  | 0.81                     | 0.16                  | 0.54                     | 0.84                  | 0.96                     |
| 0.25                             | 0.53                  | 0.77                     | 0.86                  | 0.94                     | 0.72                  | 0.93                     | 0.70                  | 0.79                     | 0.16                  | 0.56                     | 0.86                  | 0.96                     |
| 0.5                              | 0.49                  | 0.85                     | 0.88                  | 0.96                     | 0.70                  | 0.88                     | 0.90                  | 0.96                     | 0.24                  | 0.56                     | 0.76                  | 0.92                     |
| 32                               | 0.64                  | 1                        | 0.89                  | 1                        | 0.65                  | 0.97                     | 0.93                  | 1                        | 0.58                  | 0.99                     | 0.86                  | 1                        |

<sup>a</sup>Isolates are designated by source as follows: UCSC, culture strain collection of the Università Cattolica del Sacro Cuore (Rome, Italy); and DSP, culture strain collection of the UMDNJ-New Jersey Medical School (Newark, NJ, USA).

<sup>b</sup>Null CCI values were obtained from matching the mass spectrum at a definite concentration (0.5 to 0.004 µg/ml) of caspofungin (CSF) with the mass spectrum at 0 µg/ml (null concentration) of CSF. Maximum CCI values were obtained from matching the mass spectrum at a definite concentration (0.5 to 0.004 µg/ml) of caspofungin (CSF) with the mass spectrum at 32 µg/ml (maximum concentration) of CSF.

**Table S2- Continued**

| Isolate designation <sup>a</sup> | UCSC99-040412            |                             | UCSC57-030412            |                             | UCSC93-040412            |                             | DSP1011                  |                             | DSP21                    |                             |
|----------------------------------|--------------------------|-----------------------------|--------------------------|-----------------------------|--------------------------|-----------------------------|--------------------------|-----------------------------|--------------------------|-----------------------------|
|                                  | Null<br>CCI <sup>b</sup> | Maximum<br>CCI <sup>b</sup> |
| 0                                | 0,92                     | 0,23                        | 1                        | 0,86                        | 1                        | 0,63                        | 1                        | 0,67                        | 1                        | 0,78                        |
| 0.004                            | 0,25                     | 0,94                        | 0,76                     | 0,87                        | 0,63                     | 0,87                        | 0,98                     | 0,69                        | 0,86                     | 0,66                        |
| 0.008                            | 0,26                     | 0,39                        | 0,89                     | 0,96                        | 0,68                     | 0,89                        | 0,88                     | 0,74                        | 0,88                     | 0,68                        |
| 0.016                            | 0,5                      | 0,9                         | 0,89                     | 0,96                        | 0,6                      | 0,8                         | 0,83                     | 0,78                        | 0,81                     | 0,63                        |
| 0.03                             | 0,49                     | 0,86                        | 0,84                     | 0,93                        | 0,68                     | 0,89                        | 0,97                     | 0,59                        | 0,89                     | 0,64                        |
| 0.06                             | 0,26                     | 0,82                        | 0,82                     | 0,95                        | 0,68                     | 0,87                        | 0,95                     | 0,62                        | 0,8                      | 0,58                        |
| 0.125                            | 0,2                      | 0,82                        | 0,84                     | 0,96                        | 0,62                     | 0,78                        | 0,94                     | 0,75                        | 0,88                     | 0,61                        |
| 0.25                             | 0,5                      | 0,93                        | 0,86                     | 0,96                        | 0,73                     | 0,9                         | 0,87                     | 0,8                         | 0,85                     | 0,61                        |
| 0.5                              | 0,56                     | 0,75                        | 0,76                     | 0,92                        | 0,68                     | 0,88                        | 0,94                     | 0,8                         | 0,97                     | 0,73                        |
| 32                               | 0,23                     | 1                           | 0,86                     | 1                           | 0,63                     | 1                           | 0,67                     | 1                           | 0,78                     | 1                           |
